# Supplementary material for: Identification of novel endogenous antisense transcripts by DNA microarray analysis targeting complementary strand of annotated genes
Source: PubMed Central journal article supplement (PMC2741491; doi:10.1186/1471-2164-10-392), 2009-08-22
Supplement: 1471-2164-10-392-S2.pdf [file 1471-2164-10-392-S2.pdf]

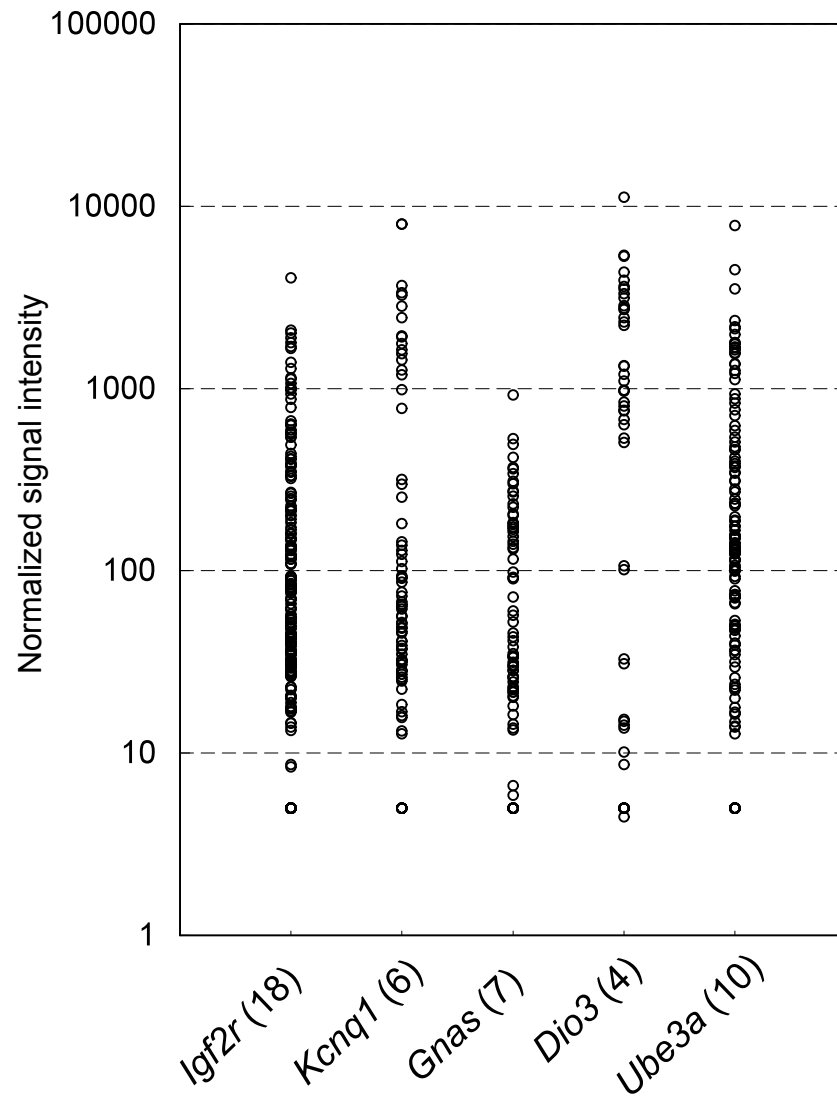

**Additional file 2.**

**Antisense expression of mouse imprinted genes**

Normalized signal intensities (normal adult mouse tissues) from AFAS probes corresponding to *Igf2r*, *Kcnq1*, *Gnas*, *Dio3*, and *Ube3a* (antisense transcripts are known for these genes). Numbers of the corresponding AFAS probes are shown in parentheses.
