# Supplementary material for: Identification of novel endogenous antisense transcripts by DNA microarray analysis targeting complementary strand of annotated genes
Source: PubMed Central journal article supplement (PMC2741491; doi:10.1186/1471-2164-10-392), 2009-08-22
Supplement: 1471-2164-10-392-S4.pdf [file 1471-2164-10-392-S4.pdf]

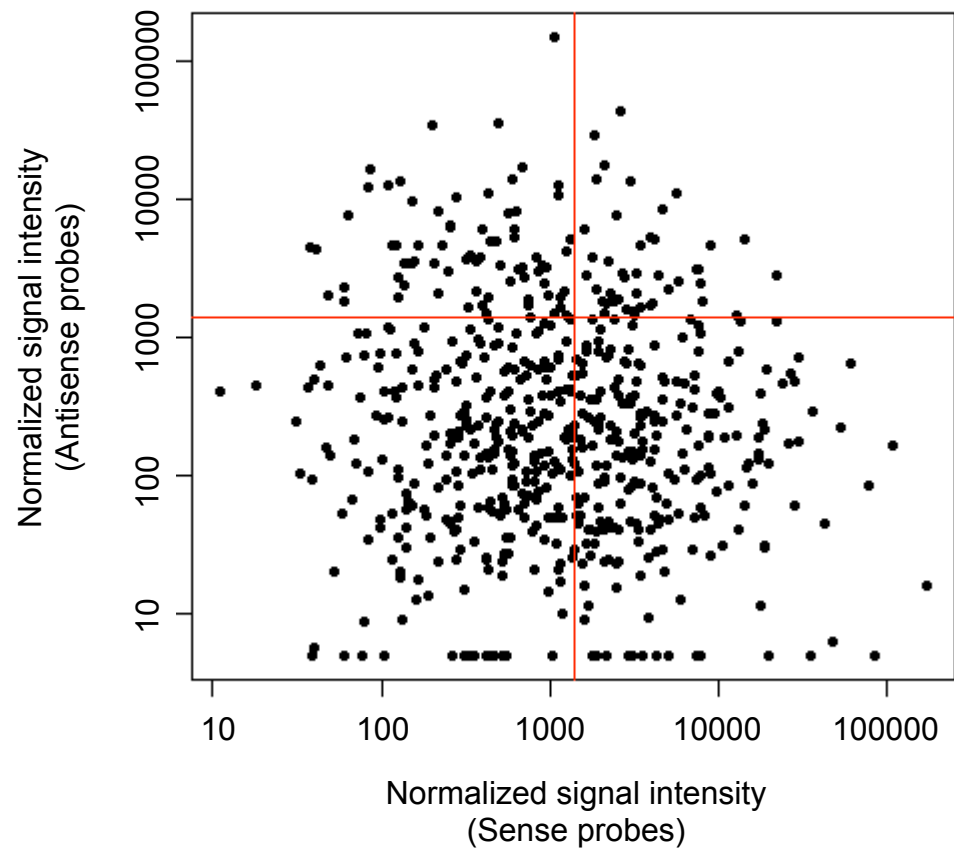

**Additional file 4.**

**Highest signal intensities from expression profiling of the 12 normal adult tissues**

Highest signal intensities for both sense and antisense probes for 12 normal adult tissues are plotted. Red line indicates the average signal obtained for the interarray normalization. All signals are derived from hybridizations of random-primed samples.
