# Supplementary material for: Identification of novel endogenous antisense transcripts by DNA microarray analysis targeting complementary strand of annotated genes
Source: PubMed Central journal article supplement (PMC2741491; doi:10.1186/1471-2164-10-392), 2009-08-22
Supplement: 1471-2164-10-392-S5.pdf [file 1471-2164-10-392-S5.pdf]

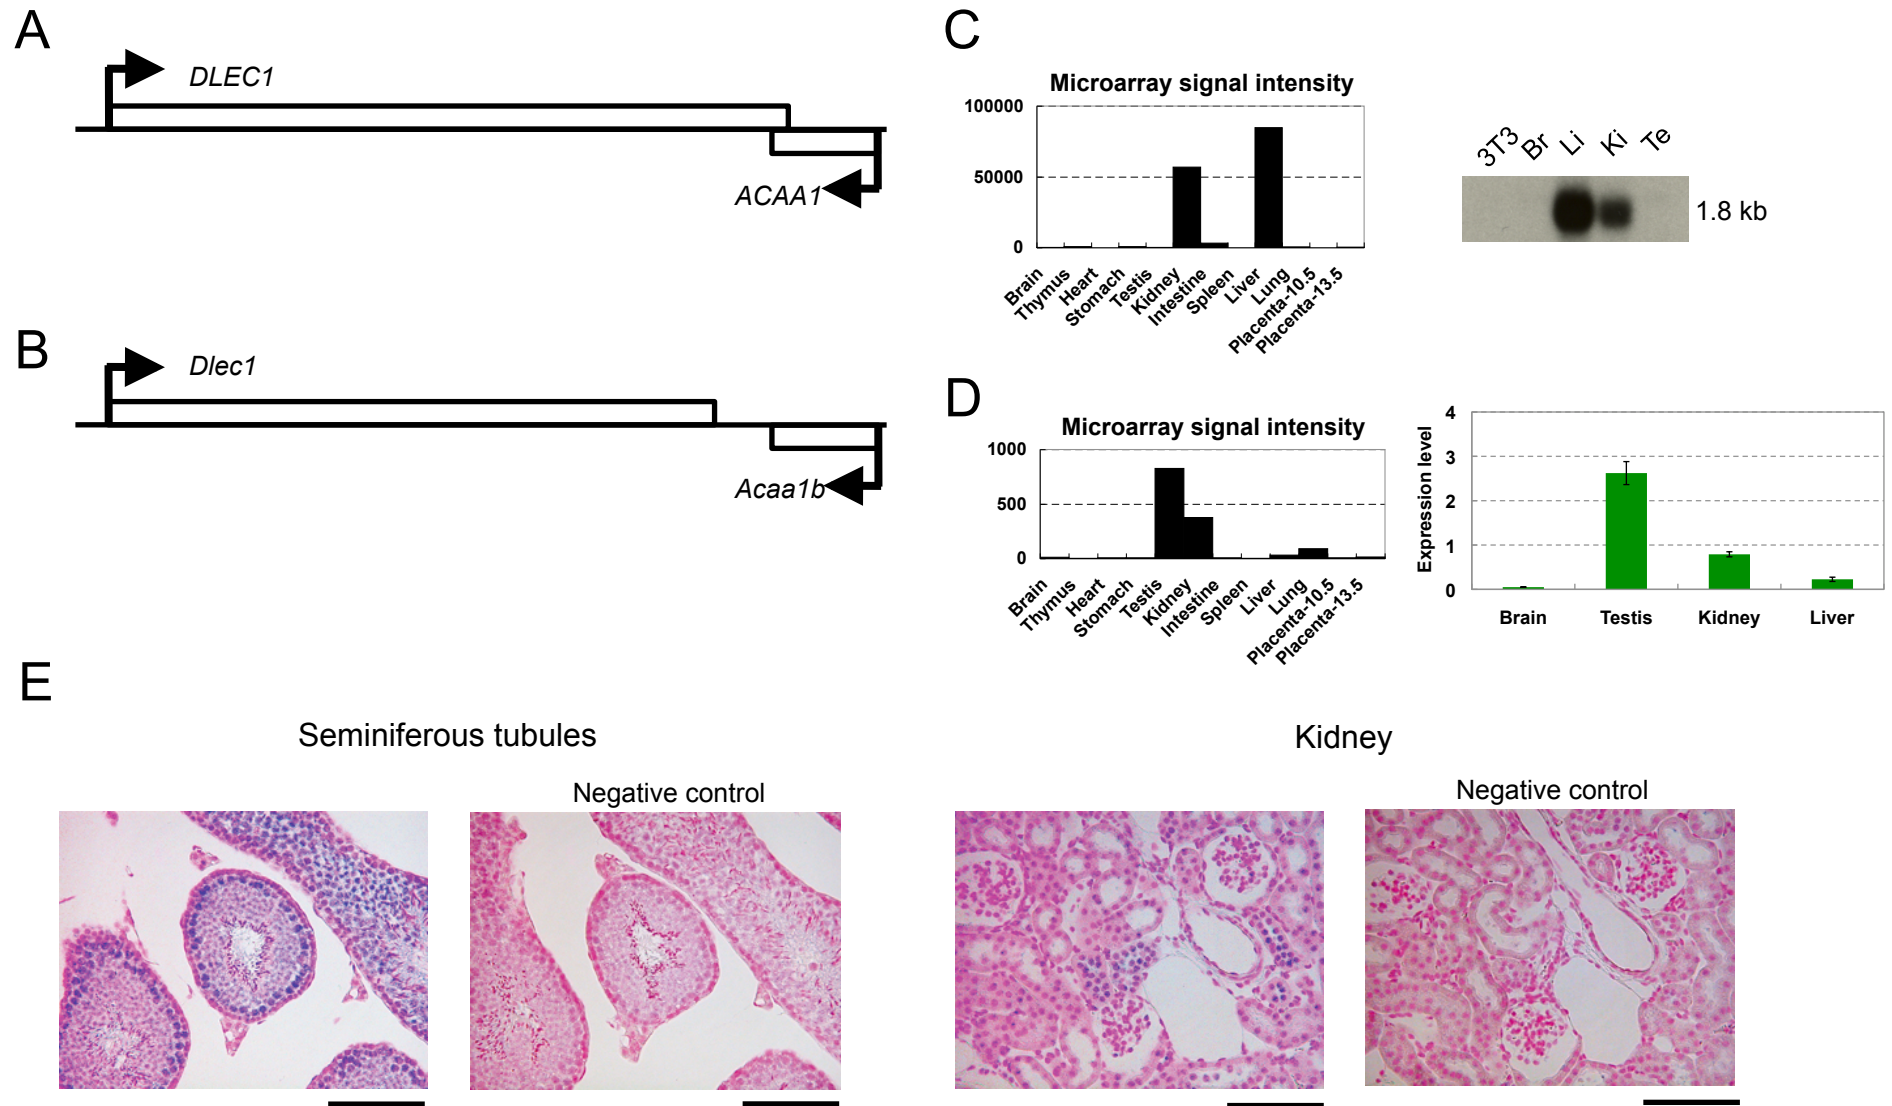

**Additional file 5. Expression analyses of sense and antisense transcripts of *Acaa1b***

(A) Schematic illustration of *ACAA1* and *DLEC1* in humans. (B) Mouse orthologous partners, *Acaa1b* and *Dlec1*. (C) Microarray signals and Northern analysis for sense expression of *Acaa1b* in NIH3T3 cells, brain (Br), liver (Li), kidney (Ki), and testis (Te). (D) Microarray signals and RT-PCR analysis for antisense transcript expression. Expression level denotes normalized gene expression level with *Gapdh*. (E) *in-situ* hybridization experiment results for antisense expression in seminiferous tubules and kidney. Negative control experiments used probe sequence selected from *Oryza sativa* putative leaf protein (NM\_197207). Scale bars: 100  $\mu$ m.
