# Supplementary material for: Identification of novel endogenous antisense transcripts by DNA microarray analysis targeting complementary strand of annotated genes
Source: PubMed Central journal article supplement (PMC2741491; doi:10.1186/1471-2164-10-392), 2009-08-22
Supplement: 1471-2164-10-392-S7.pdf [file 1471-2164-10-392-S7.pdf]

**A**Programmed cell death 6 (*Pdcd6*)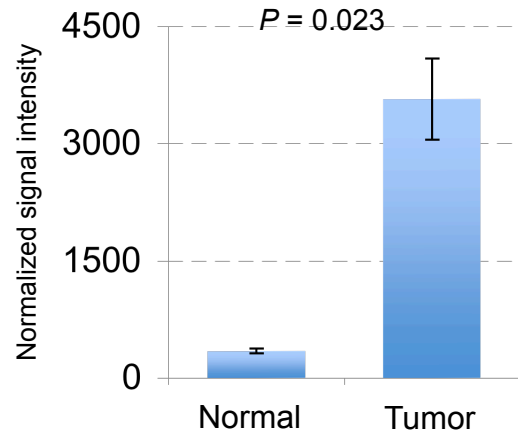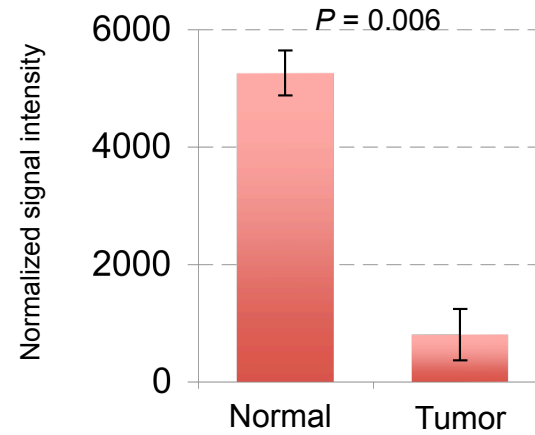**B**Dopamine receptor 4 (*Drd4*)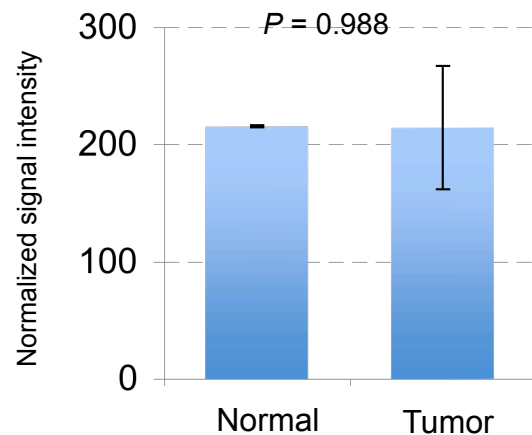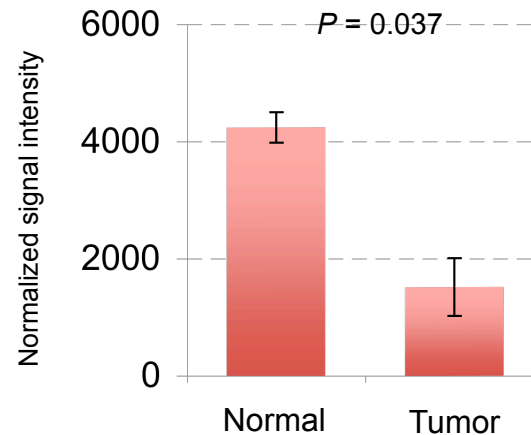**Additional file 7.****Changes in expression of *Pdcd6* and *Drd4***

(A) Signal intensities of *Pdcd6* for which sense (blue bars) and antisense (red bars) transcripts were inversely correlated between normal and tumor cells. (B) Signal intensities for *Drd4*, for which expression of the antisense transcript (red bars) was markedly changed in tumor cells, whereas that of the sense transcript (blue bars) was not.
