# Supplementary material for: Identification of novel endogenous antisense transcripts by DNA microarray analysis targeting complementary strand of annotated genes
Source: PubMed Central journal article supplement (PMC2741491; doi:10.1186/1471-2164-10-392), 2009-08-22
Supplement: 1471-2164-10-392-S9.pdf [file 1471-2164-10-392-S9.pdf]

| Gene symbol   | Accession | Direction | Forward primer         | Reverse primer        |
|---------------|-----------|-----------|------------------------|-----------------------|
| <i>Acaalb</i> | NM_146230 | Sense     | GGCATCCAATCCGGTTCTCTC  | TGCCCATCACATCCACCATTC |
|               |           | Antisense | AGTTTTTCAGGGCCACCACCAG | GCATCCAATCCGGTTCTCTCG |
| <i>Aard</i>   | NM_175503 | Sense     | AAGAAGAGGCAGGACCAGGAG  | ATCGAGGGTATGGGTGGAATC |
|               |           | Antisense | GAGGGTATGGGTGGAATCTAG  | TATTAGTCGAAGGGAGGAGGG |
| <i>Thbd</i>   | NM_009378 | Sense     | AAGAATTGGGACCTCGCTTGG  | TGTACATGTGACGTCATAAGC |
|               |           | Antisense | TCAAGTCCTCCCTACCCTCG   | CAGTGCAGTCAAGGCGAATGC |

**Additional file 9. List of primers for PCR amplification of cDNA fragments to generate probes for Northern blot analysis and *in situ* hybridization**
