# Supplementary material for: Identification of novel endogenous antisense transcripts by DNA microarray analysis targeting complementary strand of annotated genes
Source: PubMed Central journal article supplement (PMC2741491; doi:10.1186/1471-2164-10-392), 2009-08-22
Supplement: 1471-2164-10-392-S10.pdf [file 1471-2164-10-392-S10.pdf]

Negative control

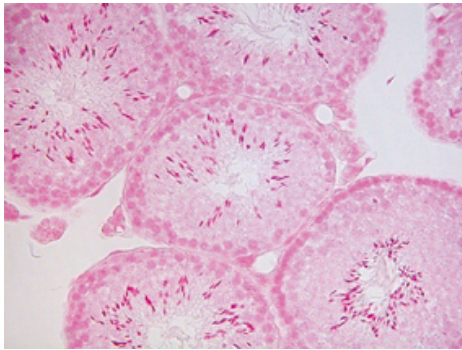

*Aard* (same as in Figure 4A)

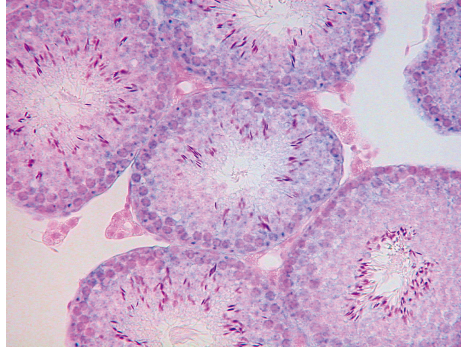

*Aard-AS* (same as in Figure 4A)

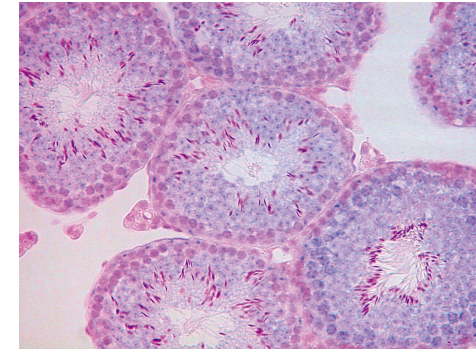

**Additional file 10. Negative control experiment of *Aard in situ* hybridization**

Probe sequence of negative control experiment was selected from *Oryza sativa* putative leaf protein (NM\_197207).

Scale bars: 100 $\mu$ m.
