# Supplementary material for: Identification of novel endogenous antisense transcripts by DNA microarray analysis targeting complementary strand of annotated genes
Source: PubMed Central journal article supplement (PMC2741491; doi:10.1186/1471-2164-10-392), 2009-08-22
Supplement: 1471-2164-10-392-S11.pdf [file 1471-2164-10-392-S11.pdf]

---

|                  |         |                        |
|------------------|---------|------------------------|
| <i>Acaalb-AS</i> | Forward | CCCATCACATCCACCATTCA   |
|                  | Reverse | GTAATTGCAGCATGGGTACACG |
| <i>Gapdh</i>     | Forward | GTGTTTCCTACCCCAATGTGTC |
|                  | Reverse | GGTCCTCAGTGTAGCCCAAGAT |

---

**Additional file 11. Primers for real-time quantitative RT-PCR**
